# Supplementary material for: Dielectric-constant effects on the exciton dissociation and photovoltaic conversion efficiency of water-soluble green conducting polymers
Source: Royal Society of Chemistry journal article supplement (doi:10.1039/d4lf00269e), 2024-10-04
Supplement: d4lf00269e1.pdf [file d4lf00269e1.pdf]

## Dielectric-constant effects on the exciton dissociation and photovoltaic conversion efficiency of water-soluble green conducting polymers

Xin Wei,<sup>1</sup> Daniel Williams,<sup>1</sup> and Giovanni Fanchini<sup>1,2</sup>

<sup>1</sup>Department of Physics & Astronomy, Western University, London ON, N6A 3K7, Canada

<sup>2</sup>Department of Chemistry, Western University, London ON, N6A 3K7, Canada

### SUPPORTING INFORMATION

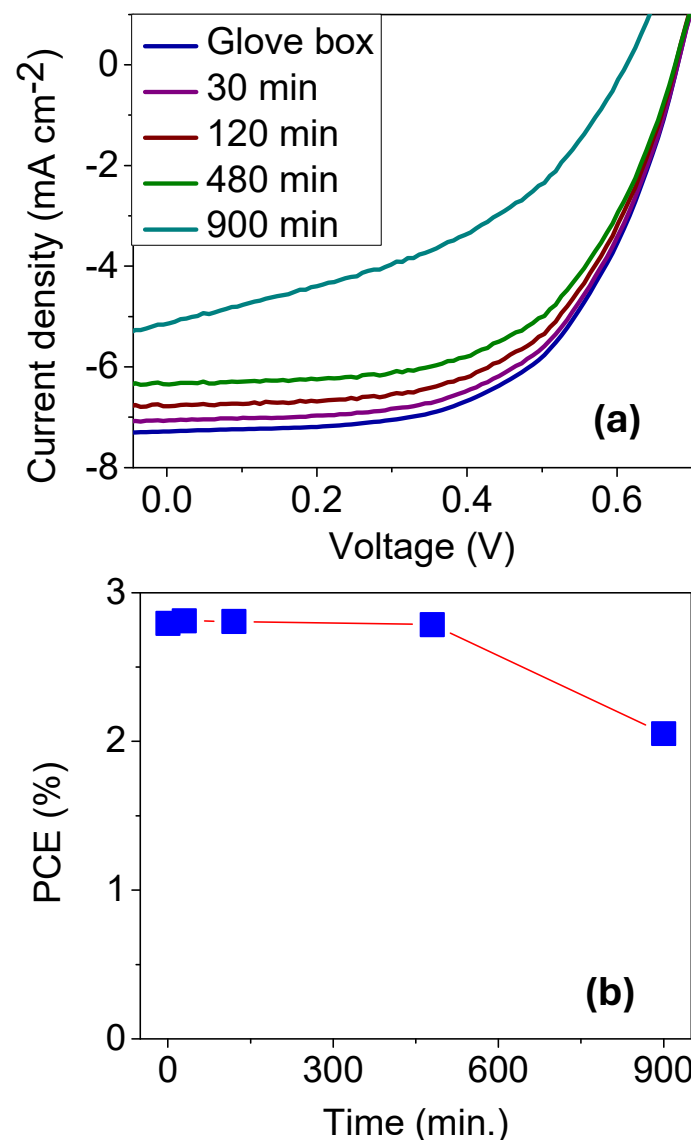

**Figure S1** – (a) JV curves and (b) photoconversion efficiency (PCE) of solar cell device spun from PTEBS:BCP solution at pH 4, measured in the glove box just after fabrication and after 30 min., 120 min., 480 min., and 900 min. of exposure to dry air. These data indicate the stability of JV curves and photovoltaic performance up to at least 8 hrs without encapsulation. Performance stability can be of course extended for a significantly longer time by encapsulating the device, for example with the same technology currently used for organic light-emitting devices.
